# Supplementary material
Source: PubMed Central journal article supplement (PMC3438850)
Supplement: Supp_Fig1.pdf [file Supp_Fig1.pdf]

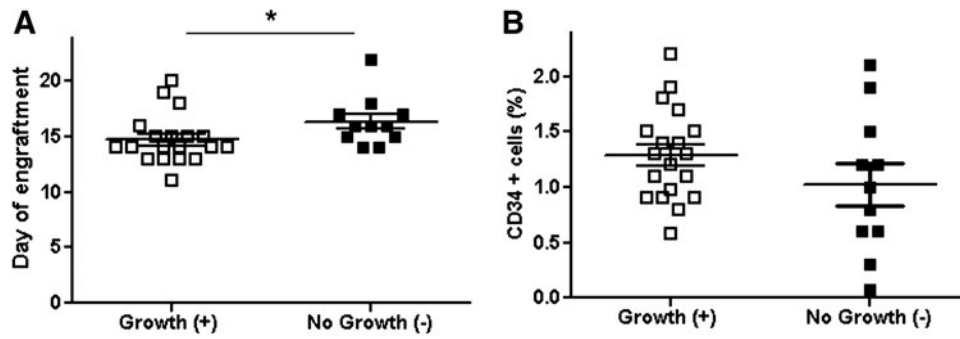

**SUPPLEMENTARY FIG. S1.** (A) Comparison among samples that were not successful in generating mesenchymal stromal cells (MSCs) in culture (-, No Growth) and samples able to generate MSCs in culture (+, Growth) (see Tables 1 and Supplementary Table S1). Day of engraftment (ED) of the donor BM into the recipient is higher in the samples unable to generate MSCs as compared to samples able to generate MSCs, including samples with limited in vitro growth ( $*P < 0.05$ ). (B) Percentage of CD34+ cells in the donor BM had a tendency to be higher in the samples able to generate MSCs in culture as compared to samples unable to generate MSCs. Samples with no data for ED or CD34+ (indicated as ND in tables 1 and S1) were not included in the analysis. BM, bone marrow; ED, engraftment day.
