# Supplementary material
Source: PubMed Central journal article supplement (PMC3438850)
Supplement: Supp_Fig2.pdf [file Supp_Fig2.pdf]

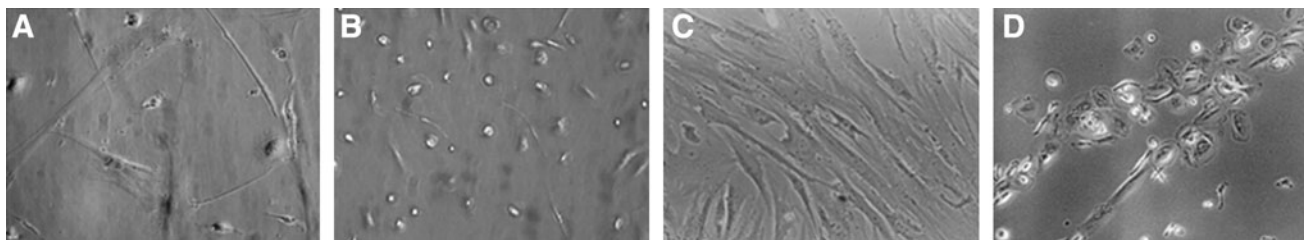

**SUPPLEMENTARY FIG. S2.** Characteristic MO-MSCs (A) and MOSN-MSCs (B) growing after seeding at passage 0. Morphology of MO-MSCs at passage 0 is typically fibroblastic, while MOSN-MSCs present cells with monocyte-like morphology; subcultures of MO- and MOSN-MSCs adopt the same morphology at passage 2-3 (C). Whole MSCs at passage 1 showing presence of the 2 morphologically different cell types in the same culture (D).
