# Supplementary material
Source: PubMed Central journal article supplement (PMC3438850)
Supplement: Supp_Fig6.pdf [file Supp_Fig6.pdf]

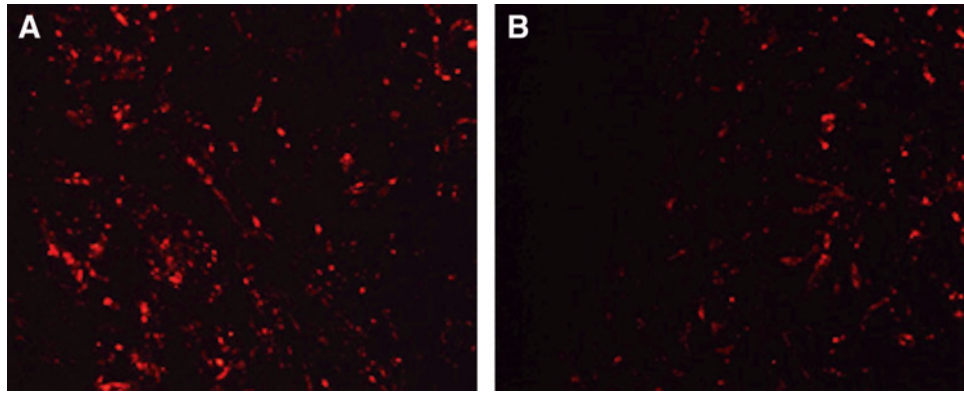

**SUPPLEMENTARY FIG. S6.** CMDiI+ MO-MSCs are recruited into the tumor mass (s.c. MDA-MB-231 breast tumor) at higher levels than MOSN-MSCs after systemic delivery. (A, B) show representative pictures of CMDiI+ MO- and MOSN-MSCs, respectively, incorporated at the tumor site.
