# Supplementary material
Source: PubMed Central journal article supplement (PMC3438850)
Supplement: Supp_Fig9.pdf [file Supp_Fig9.pdf]

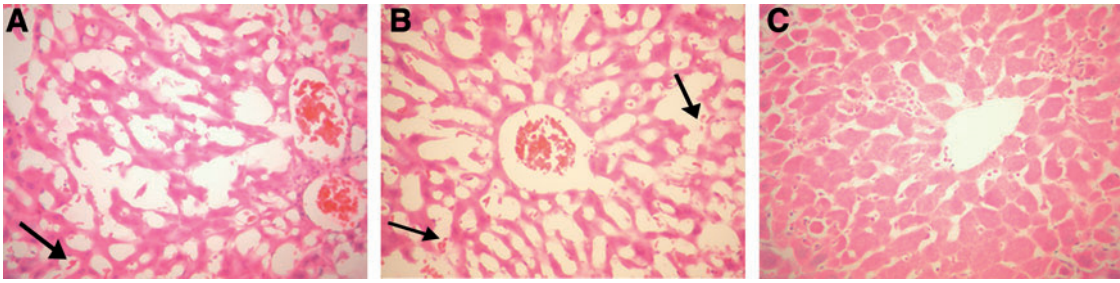

**SUPPLEMENTARY FIG. S9.** Representative histological sections of livers from (A) tumor-bearing mice (A375N xenograft) that received MSCs, (B) tumor-bearing mice that received MSCs containing virus (Ad 5/3-kBF512HRE-E1Awt), and (C) naïve mice. Histological features supporting toxic liver damage were not observed. Livers from tumor-bearing mice did not show cytoplasmic inclusions, adipose transformation, perivascular fibrosis, or inflammation; however, all mice evidenced sinusoidal dilatation as compared to naïve controls. *Arrows* show presence of *red* cells within hepatic sinusoids.
