# Supplementary material
Source: PubMed Central journal article supplement (PMC3438850)
Supplement: Supp_Table1.pdf [file Supp_Table1.pdf]

---

SUPPLEMENTARY TABLE S1. INDIVIDUAL COLLECTED SAMPLES WITH UNSUCCESSFUL IN VITRO GROWTH

---

Samples presented no technical impairments at time of collection. Samples presenting blood coagulation or other technical impairments were not included in this table.

<sup>2</sup>Percentage of CD34+ cells in the individual BM sample (donor).

<sup>3</sup>Engraftment day (ED) as + number of days with  $>500$  neutrophils,  $>2 \times 10^4$  platelets/mm<sup>3</sup> and hemoglobin  $>8$  gr/dL, without transfusion requirements (BM recipient).

BM, bone marrow; y.o., years old; p, passage; M, masculine; F, feminine.

---

| Subject | Gender | Age (y.o.) | Observations | CD34+ (%) <sup>2</sup> | ED <sup>3</sup> |
|---------|--------|------------|--------------|------------------------|-----------------|
| N2      | M      | 39         | No growth    | 0.60                   | +16             |
| N3      | F      | 20         | No growth    | 1.20                   | +14             |
| N4      | M      | 23         | No growth    | 2.10                   | +17             |
| N6      | M      | 33         | No growth    | 1.90                   | +14             |
| N8      | M      | 38         | No growth    | 1.20                   | +16             |
| N12     | M      | 35         | No growth    | 1.00                   | +15             |
| N17     | M      | 33         | No growth    | 0.60                   | +15             |
| N19     | M      | 28         | No growth    | 0.30                   | +17             |
| N21     | M      | 19         | No growth    | 1.50                   | +16             |
| N35     | M      | 40         | No growth    | 0.07                   | +22             |
