# Supplementary material
Source: PubMed Central journal article supplement (PMC3438850)
Supplement: Supp_Table2.pdf [file Supp_Table2.pdf]

SUPPLEMENTARY TABLE S2. IMMUNOPHENOTYPIC CHARACTERIZATION  
OF MO- AND MOSN-MESENCHYMAL STROMAL CELLS

---

Markers were grouped within percentage ranks according to their levels of expression (<5% negative and >75%). MO- and MOSN-mesenchymal stromal cells (MSCs) are positive for markers characteristic of MSCs (CD90, CD105, CD73, CD44, CD29/integrin  $\beta$ 1, CD166, CD13) and HLA-ABC. MO- and MOSN-MSCs are negative for the hematopoietic markers CD34, CD45, and CD14; the endothelial cell marker CD31; co-stimulatory molecules CD80 and CD86; and HLA-DR antigen.

---

## Percentage Ranks

| MO              |        | MOSN            |        |
|-----------------|--------|-----------------|--------|
| >75%            | <5%    | >75%            | <5%    |
| CD73            | CD45   | CD73            | CD45   |
| CD44            | CD34   | CD44            | CD34   |
| CD90            | CD14   | CD90            | CD14   |
| CD166           | CD80   | CD166           | CD80   |
| CD13            | CD86   | CD13            | CD86   |
| CD105           | CD31   | CD105           | CD31   |
| CD29/ $\beta$ 1 | HLA-DR | CD29/ $\beta$ 1 | HLA-DR |
| HLA-ABC         |        | HLA-ABC         |        |
